# Supplementary material
Source: PubMed Central journal article supplement (PMC10330030)
Supplement: NIHMS1887765-supplement-Supplementary_files.pdf [file NIHMS1887765-supplement-Supplementary_files.pdf]

## Supplement 1: Search Strategies

Sadowska et al.

**Ovid MEDLINE** (1946 to present)

Searched on March 7, 2022

No language, article type, or publication date limits

---

| Line # | Search                                                                                                                                                          |
|--------|-----------------------------------------------------------------------------------------------------------------------------------------------------------------|
| 1      | Terminal Care/                                                                                                                                                  |
| 2      | (terminal care or end of life or life care end or Life care ends or EOL care).tw.                                                                               |
| 3      | Hospices/ or Hospice Care/                                                                                                                                      |
| 4      | (hospice or hospices or bereavement care).tw.                                                                                                                   |
| 5      | "Hospice and Palliative Care Nursing"/ or Palliative Care/ or Palliative Medicine/                                                                              |
| 6      | (palliative or palliation or symptomatic treatment).tw.                                                                                                         |
| 7      | or/1-6                                                                                                                                                          |
| 8      | Depression/ or Depressive Disorder/ or Depressive Disorder, Major/ or Depressive Disorder, Treatment-Resistant/ or Dysthymic Disorder/                          |
| 9      | (depression or depressive or depressed or melancholi* or dysthymic or dysthymia).ti.                                                                            |
| 10     | Anxiety/ or Anxiety Disorders/                                                                                                                                  |
| 11     | (anxi* or hypervigilance or anxious*).ti.                                                                                                                       |
| 12     | Mental Disorders/                                                                                                                                               |
| 13     | (mental disorder* or mental illness* or psychiatric disorder* or psychiatric illness* or psychiatric diagnos*).tw.                                              |
| 14     | exp "Bipolar and Related Disorders"/                                                                                                                            |
| 15     | (bipolar or manic depressi* or manic disorder*).tw.                                                                                                             |
| 16     | Affective Disorders, Psychotic/                                                                                                                                 |
| 17     | (psychotic affective disorder* or psychotic mood disorder* or affective psychos*).tw.                                                                           |
| 18     | Paranoid Disorders/                                                                                                                                             |
| 19     | (paranoid or paranoia*).tw.                                                                                                                                     |
| 20     | Psychotic Disorders/ or Psychoses, Substance-Induced/                                                                                                           |
| 21     | (psychosis or psychoses or psychotic or schizoaffective disorder* or schizophreniform disorder*).tw.                                                            |
| 22     | exp Schizophrenia/                                                                                                                                              |
| 23     | (schizophreni* or dementia praecox or delusional disorder* or shared paranoid disorder* or "folie a trois" or "folie a deux" or shared psychotic disorder*).tw. |
| 24     | Agoraphobia/ or Anxiety, Separation/                                                                                                                            |
| 25     | agoraphobia*.tw.                                                                                                                                                |
| 26     | Panic Disorder/                                                                                                                                                 |
| 27     | (panic disorder* or panic attack*).tw.                                                                                                                          |
| 28     | Phobic Disorders/ or Phobia, Social/                                                                                                                            |
| 29     | (phobic or phobia or phobias).tw.                                                                                                                               |
| 30     | Stress Disorders, Post-Traumatic/                                                                                                                               |
| 31     | (post trauma* stress or post trauma* neuros* or posttrauma* stress or posttrauma* neuros* or PTSD or moral injury or moral injuries).tw.                        |
| 32     | or/8-31                                                                                                                                                         |
| 33     | 7 and 32                                                                                                                                                        |

---

**Ovid Embase** (1974 to present)

Searched on March 7, 2022

No language, article type, or publication date limits

---

|   |                                                                                   |
|---|-----------------------------------------------------------------------------------|
| 1 | terminal care/                                                                    |
| 2 | (terminal care or end of life or life care end or Life care ends or EOL care).tw. |
| 3 | hospice care/ or hospice/ or hospice patient/ or hospice nursing/                 |
| 4 | (hospice or hospices or bereavement care).tw.                                     |
| 5 | palliative therapy/ or cancer palliative therapy/                                 |
| 6 | (palliative or palliation or symptomatic treatment).tw.                           |
| 7 | or/1-6                                                                            |
| 8 | exp *depression/                                                                  |

---

(Continued)

9 (depression or depressive or depressed or melancholi\* or dysthymic or dysthymia).ti.  
10 \*anxiety disorder/ or \*anxiety/  
11 (anxiet\* or hypervigilance or anxious\*).ti.  
12 mental disease/  
13 (mental disorder\* or mental illness\* or psychiatric disorder\* or psychiatric illness\* or psychiatric diagnos\*).tw.  
14 exp bipolar disorder/  
15 (bipolar or manic depressi\* or manic disorder\*).tw.  
16 affective psychosis/  
17 (psychotic affective disorder\* or psychotic mood disorder\* or affective psychos\*).tw.  
18 paranoid psychosis/  
19 (paranoid or paranoia\*).tw.  
20 psychosis/  
21 (psychosis or psychoses or psychotic or schizoaffective disorder\* or schizophreniform disorder\*).tw.  
22 exp schizophrenia/  
23 (schizophreni\* or dementia praecox or delusional disorder\* or shared paranoid disorder\* or "folie a trois" or "folie a deux" or shared  
psychotic disorder\*).tw.  
24 agoraphobia/  
25 agoraphobia\*.tw.  
26 panic/  
27 (panic disorder\* or panic attack\*).tw.  
28 phobia/  
29 (phobic or phobia or phobias).tw.  
30 posttraumatic stress disorder/  
31 (post trauma\* stress or post trauma\* neuros\* or posttrauma\* stress or posttrauma\* neuros\* or PTSD or moral injury or moral injuries).  
tw.  
32 or/8-31  
33 7 and 32

Cochrane Library (Wiley)

Searched on March 7, 2022

No language, article type, or publication date limits

#1 ("terminal care" OR "end of life" OR "life care end" OR "Life care ends" OR "EOL care" OR "hospice" OR "hospices" OR "bereavement  
care" OR "palliative" OR "palliation" OR "symptomatic treatment"):ti,ab  
#2 ("depression" OR "depressive" OR "depressed" OR "melancholia" OR "dysthymic" OR "dysthymia" OR "anxiety" OR "hypervigilance" OR  
"anxious"):ti  
#3 ("mental disorder" OR "mental illness" OR "psychiatric disorder" OR "psychiatric illness" OR "psychiatric diagnosis" OR "bipolar" OR  
"manic depression" OR "manic depressive" OR "manic disorder" OR "psychotic affective disorder" OR "psychotic mood disorder" OR  
"affective psychosis" OR "paranoid" OR "paranoia" OR "psychosis" OR "psychoses" OR "psychotic" OR "schizoaffective disorder" OR  
"schizophreniform disorder" OR "schizophrenia" OR "schizophrenic" OR "dementia praecox" OR "delusional disorder" OR "shared  
paranoid disorder" OR "folie a trois" OR "folie a deux" OR "shared psychotic disorder" OR "agoraphobia" OR "panic disorder" OR  
"panic attack" OR "phobic" OR "phobia" OR "phobias" OR "post traumatic stress" OR "post traumatic neurosis" OR "posttraumatic  
stress" OR "posttraumatic neurosis" OR "PTSD" OR "moral injury" OR "moral injuries"):ti,ab  
#4 #2 or #3  
#5 #1 AND #4

PsycINFO (EBSCO)

Searched on March 7, 2022

No language, article type, or publication date limits

S5 S1 AND S4  
S4 S2 OR S3  
S3 TI ( "mental disorder" OR "mental illness" OR "psychiatric disorder" OR "psychiatric illness" OR "psychiatric diagnosis" OR "bipolar" OR  
"manic depression" OR "manic depressive" OR "manic disorder" OR "psychotic affective disorder" OR "psychotic mood disorder" OR  
"affective psychosis" OR "paranoid" OR "paranoia" OR "psychosis" OR "psychoses" OR "psychotic" OR "schizoaffective disorder" OR  
"schizophreniform disorder" OR "schizophrenia" OR "schizophrenic" OR "dementia praecox" OR "delusional disorder" OR "shared  
paranoid disorder" OR "folie a trois" OR "folie a deux" OR "shared psychotic disorder" OR "agoraphobia" OR "panic disorder" OR "panic attack" OR  
"panic attack" OR "phobic" OR "phobia" OR "phobias" OR "post traumatic stress" OR "post traumatic neurosis" OR "posttraumatic  
stress" OR "posttraumatic neurosis" OR "PTSD" OR "moral injury" OR "moral injuries" ) OR AB ( "mental disorder" OR "mental illness"  
OR "psychiatric disorder" OR "psychiatric illness" OR "psychiatric diagnosis" OR "bipolar" OR "manic depression" OR "manic  
depressive" OR "manic disorder" OR "psychotic affective disorder" OR "psychotic mood disorder" OR "affective psychosis" OR  
"paranoid" OR "paranoia" OR "psychosis" OR "psychoses" OR "psychotic" OR "schizoaffective disorder" OR "schizophreniform  
disorder" OR "schizophrenia" OR "schizophrenic" OR "dementia praecox" OR "delusional disorder" OR "shared paranoid disorder"  
OR "folie a trois" OR "folie a deux" OR "shared psychotic disorder" OR "agoraphobia" OR "panic disorder" OR "panic attack" OR  
"phobic" OR "phobia" OR "phobias" OR "post traumatic stress" OR "post traumatic neurosis" OR "posttraumatic stress" OR  
"posttraumatic neurosis" OR "PTSD" OR "moral injury" OR "moral injuries" )  
S2 TI ("depression" OR "depressive" OR "depressed" OR "melancholia" OR "dysthymic" OR "dysthymia" OR "anxiety" OR "hypervigilance"  
OR "anxious")  
S1 TI ( "terminal care" OR "end of life" OR "life care end" OR "Life care ends" OR "EOL care" OR "hospice" OR "hospices" OR  
"bereavement care" OR "palliative" OR "palliation" OR "symptomatic treatment" ) OR AB ( "terminal care" OR "end of life" OR "life  
care end" OR "Life care ends" OR "EOL care" OR "hospice" OR "hospices" OR "bereavement care" OR "palliative" OR "palliation" OR  
"symptomatic treatment" )

CINAHL (EBSCO)

Searched on March 7, 2022

No language, article type, or publication date limits

---

S5 S1 AND S4  
S4 S2 OR S3  
S3 TI ( "mental disorder" OR "mental illness" OR "psychiatric disorder" OR "psychiatric illness" OR "psychiatric diagnosis" OR "bipolar" OR "manic depression" OR "manic depressive" OR "manic disorder" OR "psychotic affective disorder" OR "psychotic mood disorder" OR "affective psychosis" OR "paranoid" OR "paranoia" OR "psychosis" OR "psychoses" OR "psychotic" OR "schizoaffective disorder" OR "schizophreniform disorder" OR "schizophrenia" OR "schizophrenic" OR "dementia praecox" OR "delusional disorder" OR "shared paranoid disorder" OR "folie a trois" OR "folie a deux" OR "shared psychotic disorder" OR "agoraphobia" OR "panic disorder" OR "panic attack" OR "phobic" OR "phobia" OR "phobias" OR "post traumatic stress" OR "post traumatic neurosis" OR "posttraumatic stress" OR "posttraumatic neurosis" OR "PTSD" OR "moral injury" OR "moral injuries" )  
S2 TI ("depression" OR "depressive" OR "depressed" OR "melancholia" OR "dysthymic" OR "dysthymia" OR "anxiety" OR "hypervigilance" OR "anxious")  
S1 TI ( "terminal care" OR "end of life" OR "life care end" OR "Life care ends" OR "EOL care" OR "hospice" OR "hospices" OR "bereavement care" OR "palliative" OR "palliation" OR "symptomatic treatment" )

---

AgeLine (EBSCO)

Searched on March 7, 2022

No language, article type, or publication date limits

---

S3 S1 AND S2  
S2 TI ( "mental disorder" OR "mental illness" OR "psychiatric disorder" OR "psychiatric illness" OR "psychiatric diagnosis" OR "bipolar" OR "manic depression" OR "manic depressive" OR "manic disorder" OR "psychotic affective disorder" OR "psychotic mood disorder" OR "affective psychosis" OR "paranoid" OR "paranoia" OR "psychosis" OR "psychoses" OR "psychotic" OR "schizoaffective disorder" OR "schizophreniform disorder" OR "schizophrenia" OR "schizophrenic" OR "dementia praecox" OR "delusional disorder" OR "shared paranoid disorder" OR "folie a trois" OR "folie a deux" OR "shared psychotic disorder" OR "agoraphobia" OR "panic disorder" OR "panic attack" OR "phobic" OR "phobia" OR "phobias" OR "post traumatic stress" OR "post traumatic neurosis" OR "posttraumatic stress" OR "posttraumatic neurosis" OR "PTSD" OR "moral injury" OR "moral injuries" OR "depression" OR "depressive" OR "depressed" OR "melancholia" OR "dysthymic" OR "dysthymia" OR "anxiety" OR "hypervigilance" OR "anxious" )  
S1 ( "terminal care" OR "end of life" OR "life care end" OR "Life care ends" OR "EOL care" OR "hospice" OR "hospices" OR "bereavement care" OR "palliative" OR "palliation" OR "symptomatic treatment" )

---

## ***Supplement 2 Data Extraction Template***

### **General Information:**

Full Citation in APA Format:

Country or countries in which study was conducted:

Data collection period (year(s)):

### **Methods:**

Data Sources:

- Large scale health database
- Individual medical records
- Insurance claims
- Questionnaires
- Interviews
- Other Study design:
  - Prospective cohort study
  - Retrospective cohort study
  - Cross-sectional study
  - Case-control study
  - Secondary analysis of RCT or other experimental data
  - Qualitative study
  - Other

Nationwide or population-based study?

- Yes
- No

Sample Size (If there is a discrepancy between initial sample size versus the final sample used to generate the results, refer to the analytic sample. Also, please include the breakdown of cohort/case versus control/comparison group sizes, if applicable.):

Population demographics (e.g., women only, veterans only, older adults only): Population medical status (e.g., specific diagnosis, prognosis under 6 months) Does the study include cancer patients?

- Yes, all subjects with advanced cancer
- Yes, all subjects with cancer at varied stages
- Cancer patients included but not exclusively
- No cancer patients included or medical diagnosis unspecified Other relevant inclusion criteria:

Other exclusion criteria:

Palliative or end-of-life care status of enrolees:

- All patients receiving palliative or end-of-life (<6mo prognosis) care
- Some patients receiving palliative or end-of-life care
- None of the patients receiving palliative or end-of-life care
- Unclear Settings of care:
- Inpatient palliative
- Outpatient palliative
- Inpatient general medical/surgical
- Inpatient oncology
- Outpatient medical/oncology
- Nursing home
- Hospice
- Home Care
- Specific setting not specified or applicable
- Other

### ***Independent variable(s)***

Psychiatric morbidity included in study

- Depression
- Anxiety
- PTSD
- Schizophrenia/psychotic disorders
- Other (please specify)

Measures of psychiatric morbidity:

- Hospital Anxiety and Depression Scale
- Center for Epidemiological Studies-Depression
- Edmonton Symptom Assessment Scale
- Patient Health Questionnaire-9
- General Anxiety Disorder-7
- Hamilton Depression Rating Scale
- Beck Depression Inventory
- Geriatric Depression Scale
- Diagnostic codes (ICD-9/10)
- Other

Threshold or cutoff used to define psychiatric symptoms/disorder: Dependent Variables:

**Continued**

---

|                       |                       |
|-----------------------|-----------------------|
| Definition of outcome | Measurement tool used |
|-----------------------|-----------------------|

---

|                       |                       |
|-----------------------|-----------------------|
| Definition of outcome | Measurement tool used |
|-----------------------|-----------------------|

---

Clinical outcome 1  
Clinical outcome 2  
Clinical outcome 3  
Clinical outcome 4  
Clinical outcome 5  
Clinical outcome #

---

|                       |                       |
|-----------------------|-----------------------|
| Definition of outcome | Measurement tool used |
|-----------------------|-----------------------|

---

Health services outcome 1  
Health services outcome 2  
Health services outcome 3  
Health services outcome 4  
Health services outcome 5  
Health services outcome #

---

Does the study control for potential presence of other mental disorders (for instance, controlling for presence of depression in a study on the relationship between schizophrenia and emergency department use at the end of life, either by the use of exclusion criteria or by additional statistical analysis)?

- Yes
- No

***Results***

---

|                                                              | Result 1 | Result 2 | Result 3 | Result # |
|--------------------------------------------------------------|----------|----------|----------|----------|
| Relevant outcome                                             |          |          |          |          |
| Type of result (association, odds ratio, relative risk etc.) |          |          |          |          |
| Main finding                                                 |          |          |          |          |
| Statistically significant?                                   |          |          |          |          |
| Confounders identified and accounted for?                    |          |          |          |          |

---

**Misc:**

Relevant references cited in paper:  
Other information relevant but not covered above.
